# Supplementary material for: Production of d-Tagatose by Whole-Cell Conversion of Recombinant Bacillus subtilis in the Absence of Antibiotics
Source: MDPI journal article supplement (doi:10.3390/biology10121343), 2021-12-16
Supplement: s1 [file s1]

## Supplementary Materials

# Production of D-Tagatose by Whole-Cell Conversion of Recombinant *Bacillus subtilis* in the Absence of Antibiotics

Xian Zhang, Ruiqi Lu, Qiang Wang, Mengkai Hu, Zhiyue Li, Meijuan Xu, Taowei Yang, Rongzhen Zhang and Zhiming Rao

**Table S1.** Comparison of characteristics of L-Als from various microorganisms.

| Source of L-arabinose isomerase                | Reaction condition | Metal ion or boric acid requirement           | concentration | concentration | Conversion yield(%) |
|------------------------------------------------|--------------------|-----------------------------------------------|---------------|---------------|---------------------|
| <b>Mesophilic</b>                              |                    |                                               |               |               |                     |
| <i>Lactobacillus sakei</i>                     | pH7.4,50°C         | Mn <sup>2+</sup> (1.0)                        | 54            | 45.9          | 85 (48 h)           |
| <i>Lactobacillus brevis</i> PC16               | pH6.5,67°C         | Mn <sup>2+</sup> (1.0)                        | 125           | 99.6          | 79.7(28 h)          |
| <i>Lactobacillus fermentum</i> CGMCC 2971      | pH6.5,65°C         | Mn <sup>2+</sup> (1.0)                        | 9             | 4.95          | 55(12 h)            |
| <i>Lactobacillus fermentum</i> CGMCC 2971      | pH6.5,70°C         | Mn <sup>2+</sup> (1.0)                        | 100           | 75            | 75(24 h)            |
| <i>Pediococcus pentosaceus</i> PC-5            | pH6.0,50°C         | Mn <sup>2+</sup> (0.6) Co <sup>2+</sup> (0.8) | 5             | 2.6           | 52(24 h)            |
| <i>Enterococcus faecium</i> DBFIOE36           | pH5.5,50°C         | Mn <sup>2+</sup> (0.3)                        | 90            | 40.5          | 45(48 h)            |
| <i>Lactobacillus plantarum</i> WU14            | pH7.17,50°C        | Mn <sup>2+</sup> (10.0)                       | 108           | 41.4          | 38.31(28 h)         |
| <i>Bacillus coagulans</i> NL01                 | pH7.5,60°C         | Mn <sup>2+</sup> (0.5) Co <sup>2+</sup> (0.5) | 20            | 10.6          | 53(20 h)            |
| <b>Thermophilic</b>                            |                    |                                               |               |               |                     |
| <i>Geobacillus therodentitricans</i>           | pH8.5,50°C         | No                                            | 300           | 165           | 55(2 h)             |
| <i>Geobacillus therodentitricans</i>           | pH8.5-9.0, 60°C    | boric acid (1110.0)                           | 500           | 370           | 74(24 h)            |
| <i>Bacillus thermoglucosidasius</i> KCTC 1828  | pH7.4,40°C         | Mn <sup>2+</sup> (1.0)                        | 36            | 16.42         | 45.6(48 h)          |
| <i>Acidothermus cellulolytic</i> ATCC 43068    | pH7.5,75°C         | Mn <sup>2+</sup> (1.0) Co <sup>2+</sup> (0.5) | 9             | 4.8           | 53(12 h)            |
| <i>Alicyclobacillus acidocaldarius</i>         | pH6.0,60°C         | Mn <sup>2+</sup> (1.0) Co <sup>2+</sup> (1.0) | 18            | 7.9           | 44(12 h)            |
| <i>Alicyclobacillus hesperidium</i> URH17-3-68 | pH7.0,70°C         | Co <sup>2+</sup> (1.0)                        | 9             | 3.9           | 43(27 h)            |
| <b>Hyperthermophilic</b>                       |                    |                                               |               |               |                     |
| <i>Thermotoga neapolitana</i> 5068             | pH7.0,80°C         | Mn <sup>2+</sup> (1.0) Co <sup>2+</sup> (1.0) | 1.8           | 1.2           | 68(20 h)            |
| <i>Thermotoga Maritima</i>                     | pH7.5,70°C         | Mn <sup>2+</sup> (5.0)                        | 500           | 190           | 38(242 h)           |

| Host expressing system            | Reference |
|-----------------------------------|-----------|
| <i>Lactobacillus plantarum</i>    | [16]      |
| <i>B. subtilis</i> DB403          | [15]      |
| <i>E. coli</i>                    | [14]      |
| <i>B. subtilis</i> 168            | [13]      |
| <i>E. coli</i>                    | [12]      |
| <i>E. coli</i>                    | [11]      |
| <i>Lactococcus lactis</i> NZ9000  | [10]      |
| <i>E. coli</i>                    | [9]       |
| <i>Corynebacterium glutamicum</i> | [8]       |
| <i>E. coli</i>                    | [7]       |
| <i>E. coli</i>                    | [6]       |
| <i>E. coli</i>                    | [5]       |
| <i>E. coli</i>                    | [4]       |
| <i>E. coli</i>                    | [3]       |
| <i>E. coli</i>                    | [2]       |
| <i>E. coli</i>                    | [1]       |

**Table S2.** List of bacterial strains and plasmids used in this study.

| Strains and plasmids                        | Characteristics                                                                                         | Source and reference |
|---------------------------------------------|---------------------------------------------------------------------------------------------------------|----------------------|
| <i>E. coli</i> K-12                         | $\beta$ -galactosidase and arabinose isomerase gene provider                                            | Invitrogen           |
| <i>B. subtilis</i> 168                      | trpC, expression host of <i>B. subtilis</i>                                                             | Takara               |
| 168 D1P1( <i>alrA</i> -, Zeo <sup>r</sup> ) | 168 derivative, $\Delta$ <i>alrA</i> , lox71-Zeo <sup>r</sup> -lox66                                    | This study           |
| 168 D1P2( <i>alrA</i> -, Kan <sup>r</sup> ) | 168 derivative, $\Delta$ <i>alrA</i> , lox72, Kan <sup>r</sup> , pTSC                                   | This study           |
| 168 D1( <i>alrA</i> -)                      | 168 derivative, $\Delta$ <i>alrA</i>                                                                    | This study           |
| 168 D1/pMA5- <i>alrA</i>                    | The recombinant 168 D1 strain harboring the plasmid pMA5- <i>alrA</i>                                   | This study           |
| 168 D1/pMA5- <i>alrA-araA</i>               | The recombinant 168 D1 strain harboring the plasmid pMA5- <i>alrA-araA</i>                              | This study           |
| 168 D1/pMA5- <i>alrA-lacZ</i>               | The recombinant 168 D1 strain harboring the plasmid pMA5- <i>alrA-lacZ</i>                              | This study           |
| 168 D1/pMA5- <i>alrA-lacZ-araA</i>          | The recombinant 168 D1 strain harboring the plasmid pMA5- <i>alrA-lacZ-araA</i>                         | This study           |
| 168 D2P1(Zeo <sup>r</sup> )                 | 168 derivative, <i>lacZ</i> , $\Delta$ <i>alrA</i> , lox71-Zeo <sup>r</sup> -lox66                      | This study           |
| 168 D2P2(Kan <sup>r</sup> )                 | 168 derivative, <i>lacZ</i> , $\Delta$ <i>alrA</i> , lox72, Kan <sup>r</sup> , pTSC                     | This study           |
| 168 D2( <i>alrA</i> -)                      | 168 derivative, <i>lacZ</i> , $\Delta$ <i>alrA</i>                                                      | This study           |
| 168 D2/pMA5- <i>alrA</i>                    | The recombinant 168 D2 strain harboring the plasmid pMA5- <i>alrA</i>                                   | This study           |
| 168 D2/pMA5- <i>alrA-araA</i>               | The recombinant 168 D2 strain harboring the plasmid pMA5- <i>alrA-araA</i>                              | This study           |
| <b>Plasmids</b>                             |                                                                                                         |                      |
| pMA5                                        | Kan <sup>r</sup> , Zeo <sup>r</sup> , containing the <i>Hpa</i> II promoter                             | Takara               |
| p7Z6                                        | pMD18-T ligated with lox71-Zeo <sup>r</sup> -lox66 cassette                                             | Takara               |
| pTSC                                        | Kan <sup>r</sup> , temperature sensitive in <i>B. subtilis</i> containing Pspac-cre expression cassette | Takara               |
| pMA5- <i>alrA</i>                           | <i>B. subtilis</i> expression vector containing <i>alrA</i> gene                                        | This study           |
| pMA5- <i>alrA-araA</i>                      | <i>B. subtilis</i> expression vector containing <i>alrA</i> and <i>araA</i> genes                       | This study           |
| pMA5- <i>alrA-lacZ</i>                      | <i>B. subtilis</i> expression vector containing <i>alrA</i> and <i>lacZ</i> genes                       | This study           |
| pMA5- <i>araA</i>                           | <i>B. subtilis</i> expression vector containing <i>araA</i> gene                                        | This study           |
| pMA5- <i>alrA-lacZ-araA</i>                 | <i>B. subtilis</i> co-expression vector containing <i>alrA</i> , <i>araA</i> and <i>lacZ</i> gene       | This study           |

Zeo<sup>r</sup>: bleomycin resistance; Kan<sup>r</sup>: kanamycin resistance;.

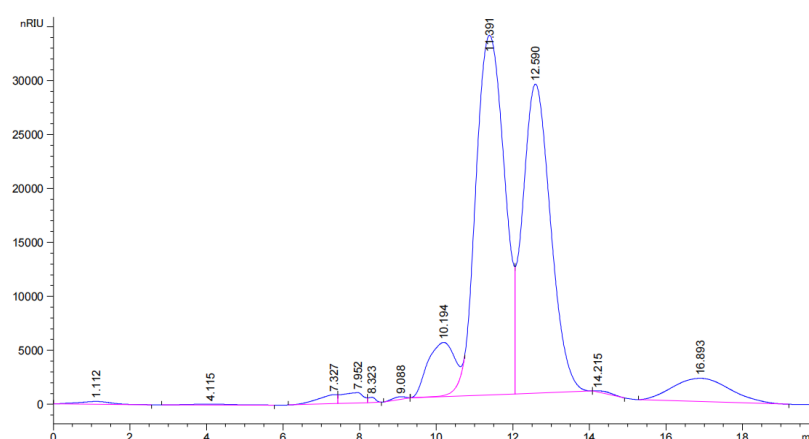

**Figure S1.** HPLC results of conversion products. The conversion using *B.subtilis* 168 D1/pMA5-*alrA-lacZ-araA* whole-cells. Bioconversion was performed at 40 °C, pH 8 (0.2 mol/L citric acid- $\text{Na}_2\text{HPO}_4$ ),  $\text{Mn}^{2+}$  concentration of 0.1 mol/L, and 0.1% TritonX-100, and cell concentration resulting in an OD of 40 at 600 nm. 10.194 min: lactose, 11.391 min: glucose, 12.590min: galactose, 16.893 min: D-tagatose.

## References

- Bortone, N.; Fidaleo, M. Stabilization of immobilized L-arabinose isomerase for the production of D-tagatose from D-galactose. *Biotechnol. Prog.* **2020**, *36*, e3033, doi:10.1002/btpr.3033.
- Kim, B.C.; Lee, Y.H.; Lee, H.S.; Lee, D.W.; Choe, E.A.; Pyun, Y.R. Cloning, expression and characterization of L-arabinose isomerase from *Thermotoga neapolitana*: bioconversion of D-galactose to D-tagatose using the enzyme. *FEMS Microbiol. Lett.* **2002**, *212*, 121–126.
- Fan, C.; Liu, K.; Zhang, T.; Zhou, L.; Xue, D.; Jiang, B.; Mu, W. Biochemical characterization of a thermostable L-arabinose isomerase from a thermoacidophilic bacterium, *Alicyclobacillus hesperidum* URH17-3-68. *Biotechnol. Prog.* **2003**, doi:10.1016/j.molcatb.2014.02.001.
- Lee, S.J.; Lee, D.W.; Choe, E.A.; Hong, Y.H.; Kim, S.B.; Kim, B.C.; Pyun, Y.R. Characterization of a Thermoacidophilic L-Arabinose Isomerase from *Alicyclobacillus acidocaldarius*: Role of Lys-269 in pH Optimum. *Appl. Environ. Microbiol.* **2005**, *71*, 7888–7896, doi:10.1128/AEM.71.12.7888-7896.2005.
- Cheng, L.; Mu, W.; Zhang, T.; Jiang, B. An L-arabinose isomerase from *Acidothermus cellulolyticus* ATCC 43068: cloning, expression, purification, and characterization. *Appl. Microbiol. Biotechnol.* **2010**, *86*, 1089–1097, doi:10.1007/s00253-009-2322-z.
- Seo, M.J. Characterization of an L-arabinose isomerase from *Bacillus thermoglucosidasius* for D-tagatose production. *Biosci. Biotechnol. Biochem.* **2013**, *77*, 385–388, doi:10.1271/bbb.120723.
- Lim, B.C.; Kim, H.J.; Oh, D.K. High Production of d-Tagatose by the Addition of Boric Acid. *Biotechnol. Prog.* **2007**, *23*, 824–828.
- Shin, K.C.; Sim, D.H.; Seo, M.J.; Oh, D.K. Increased Production of Food-Grade D-Tagatose from D-Galactose by Permeabilized and Immobilized Cells of *Corynebacterium glutamicum*, a GRAS Host, Expressing D-Galactose Isomerase from *Geobacillus thermodenitrificans*. *J. Agric. Food Chem.* **2016**, *64*, 8146–8153, doi:10.1021/acs.jafc.6b03588.
- Mei, W.; Wang, L.; Zang, Y.; Zheng, Z.; Ouyang, J. Characterization of an L-arabinose isomerase from *Bacillus coagulans* NL01 and its application for D-tagatose production. *BMC Biotechnol.* **2016**, *16*, 55, doi:10.1186/s12896-016-0286-5.
- Chang, X.; Ying, B.; Zhang, Y.; Cao, H.; Zhou, T.; Zhong, P.A.; Xu, B. The Study of Food-Grade Induced Expression and Enzymatic Properties of L-Arabinose Isomerase from *Lactobacillus plantarum* WU14 with High D-Tagatose Yield. *Food Nutr. Sci.* **2016**, *07*, 320–337, doi:10.4236/fns.2016.74034.
- Manzo, R.M.; Antunes, A.; de Sousa Mendes, J.; Hissa, D.C.; Goncalves, L.R.B.; Mammarella, E.J. Biochemical Characterization of Heat-Tolerant Recombinant L-Arabinose Isomerase from *Enterococcus faecium* DBFIQ E36 Strain with Feasible Applications in D-Tagatose Production. *Mol. Biotechnol.* **2019**, *61*, 385–399, doi:10.1007/s12033-019-00161-x.
- Men, Y.; Zhu, Y.; Zhang, L.; Kang, Z.; Izumori, K.; Sun, Y.; Ma, Y. Enzymatic conversion of D-galactose to D-tagatose: Cloning, overexpression and characterization of L-arabinose isomerase from *Pediococcus pentosaceus* PC-5. *Microbiol. Res.* **2014**, *169*, 171–178, doi:10.1016/j.micres.2013.07.001.
- Liu, Y.; Li, S.; Xu, H.; Wu, L.; Xu, Z.; Liu, J.; Feng, X. Efficient production of D-tagatose using a food-grade surface display system. *J. Agric. Food Chem.* **2014**, *62*, 6756–6762, doi:10.1021/jf501937j.
- Xu, Z.; Qing, Y.; Li, S.; Feng, X.; Xu, H.; Ouyang, P. A novel L-arabinose isomerase from *Lactobacillus fermentum* CGMCC2921 for D-tagatose production: Gene cloning, purification and characterization. *J. Mol. Catal. B Enzym.* **2011**, *70*, 1–7, doi:10.1016/j.molcatb.2011.01.010.

15. Guo, Q.; An, Y.; Yun, J.; Yang, M.; Magocha, T.A.; Zhu, J.; Xue, Y.; Qi, Y.; Hossain, Z.; Sun, W.; et al. Enhanced D-tagatose production by spore surface-displayed L-arabinose isomerase from isolated *Lactobacillus brevis* PC16 and biotransformation. *Bioresour. Technol.* **2018**, *247*, 940–946, doi:10.1016/j.biortech.2017.09.187.
16. Bober, J.R.; Nair, N.U. Galactose to tagatose isomerization at moderate temperatures with high conversion and productivity. *Nat. Commun.* **2019**, *10*, 4548, doi:10.1038/s41467-019-12497-8.
